# Supplementary material for: Functional Modulation of Vascular Adhesion Protein-1 by a Novel Splice Variant
Source: PubMed Central journal article supplement (PMC3548902; doi:10.1371/journal.pone.0054151), 2013-01-18
Supplement: pone.0054151.s004.pdf [file pone.0054151.s004.pdf]

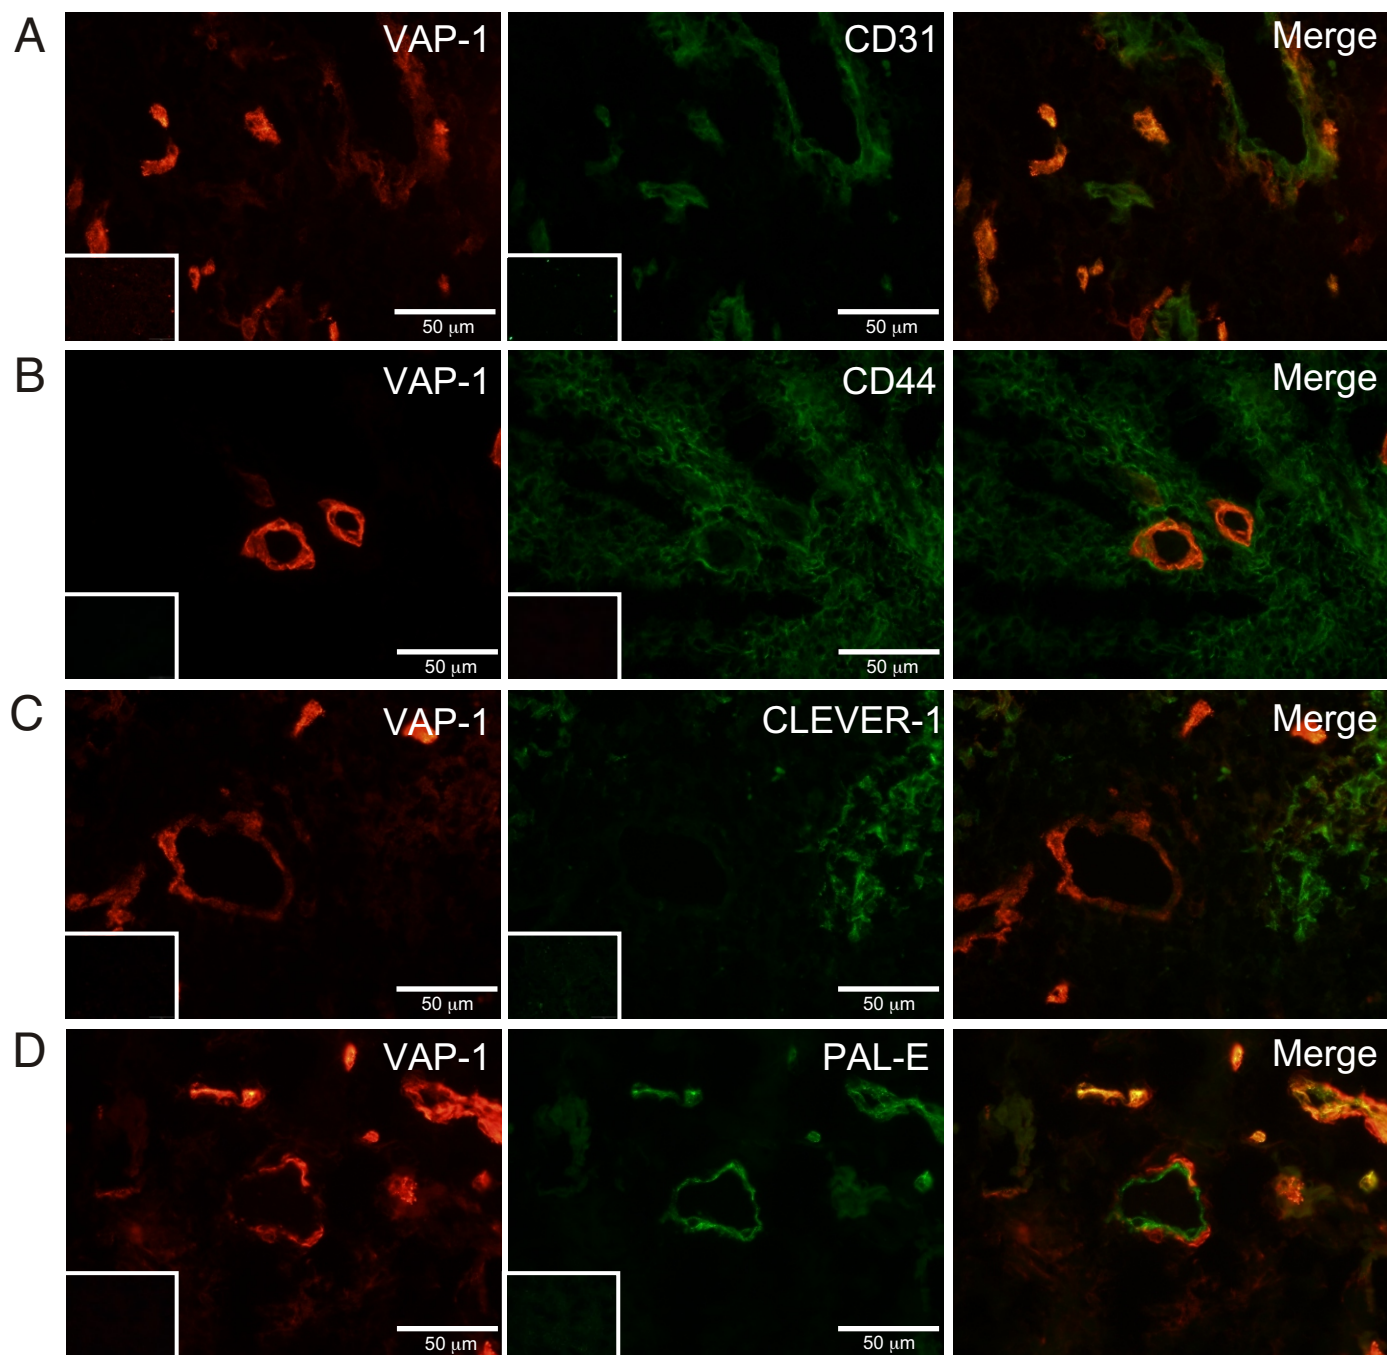

Figure S4
