# Supplementary material for: Functional Modulation of Vascular Adhesion Protein-1 by a Novel Splice Variant
Source: PubMed Central journal article supplement (PMC3548902; doi:10.1371/journal.pone.0054151), 2013-01-18
Supplement: pone.0054151.s006.pdf [file pone.0054151.s006.pdf]

Table S1

| Antibody | Isotype                 | Reference | VAP-1 | VAP-1 $\Delta$ 3 |
|----------|-------------------------|-----------|-------|------------------|
| poly-VAP | rabbit IgG              | [S1]      | +     | +                |
| TK 8-18  | mouse IgG <sub>2a</sub> | [S2]      | +     | +                |
| TK 8-14  | mouse IgG <sub>2a</sub> | [S2]      | +     | +                |
| 2D10     | mouse IgG <sub>1</sub>  | [S2]      | +     | +                |
| JG 2.10  | rat IgG                 | [S3]      | +     | -                |

S1. Maula SM, Salminen T, Kaitaniemi S, Nymalm Y, Smith DJ, et al. (2005) Carbohydrates located on the top of the "cap" contribute to the adhesive and enzymatic functions of vascular adhesion protein-1. *Eur J Immunol* 35: 2718-2727.

S2. Kurkijarvi R, Adams DH, Leino R, Mottonen T, Jalkanen S, et al. (1998) Circulating form of human vascular adhesion protein-1 (VAP-1): increased serum levels in inflammatory liver diseases. *J Immunol* 161: 1549-1557.

S3. Salmi M, Smith DJ, Bono P, Jalkanen S. (1997) Vascular adhesion protein 1. In: Kishimoto T, Hitoshi K, von dem Borne AE, Goyert S, Mason D, et al., editors. *Leukocyte typing VI. White cell differentiation antigens*. Garland Publishing, Inc. pp. 772-773.
